# Supplementary material for: Titanium complexes supported by imidazo[1,5-a]pyridine-containing pyrrolyl ligand as catalysts for hydroamination and polymerization reactions, and as an antitumor reagent
Source: Royal Society of Chemistry journal article supplement (doi:10.1039/c4ra14692a), 2014-12-22
Supplement: c4ra14692a1.pdf [file c4ra14692a1.pdf]

## Supporting Information

### Titanium complexes supported by imidazo[1,5-*a*]pyridine-containing pyrrolyl ligand as catalysts for hydroamination and polymerization reactions, and as antitumor reagent

Jinna Liu,<sup>a</sup> Yuhua Cao,<sup>b</sup> Lei Li,<sup>a</sup> Hao Pei,<sup>a</sup> Yanmei Chen,<sup>a</sup> Jinfa Hu,<sup>a</sup> Yaru Qin,<sup>a</sup> Yahong Li,<sup>a</sup> Wu Li<sup>c</sup> and Wei Liu<sup>a</sup>

<sup>a</sup> *Laboratory of Organic Synthesis of Jiangsu Province, College of Chemistry, Chemical Engineering and Materials Science, Soochow University, Suzhou 215006, China. E-mail: liyahong@suda.edu.cn.*

<sup>b</sup> *Suzhou Institute of Nano-tech and Nano-bionics, Chinese Academy of Sciences, Suzhou 215125, China.*

<sup>c</sup> *CAS Key Laboratory of Salt Lake Resources and Chemistry, Qinghai Institute of Salt Lakes, Chinese Academy of Sciences, Xining 810008, China*

|                                                                                        |    |
|----------------------------------------------------------------------------------------|----|
| 1. Crystallographic data for complexes <b>2</b> and <b>3</b> .....                     | 2  |
| 2. <sup>1</sup> H and <sup>13</sup> C NMR spectra for the ligand HL and complexes..... | 12 |
| 3. <sup>1</sup> H NMR spectra for the hydroamination products.....                     | 16 |
| 4. Ring-opening polymerization of ε-caprolactone by complex <b>3</b> .....             | 28 |

#### 1. Crystallography data for **2** and **3**

##### 1.1 Crystal data and structure refinements for **2** and **3**

**Table 1** Crystal data and structure refinements for **2** and **3**

| Complex                                         | <b>2</b>                                          | <b>3</b>                                                         |
|-------------------------------------------------|---------------------------------------------------|------------------------------------------------------------------|
| Empirical formula                               | C <sub>30</sub> H <sub>36</sub> N <sub>8</sub> Ti | C <sub>28</sub> H <sub>30</sub> N <sub>6</sub> O <sub>2</sub> Ti |
| Formula weight                                  | 556.54                                            | 530.45                                                           |
| Temperature                                     | 296(2) K                                          | 293(2) K                                                         |
| Wavelength                                      | 0.71073 Å                                         | 0.71073 Å                                                        |
| Crystal system                                  | Monoclinic                                        | Monoclinic                                                       |
| Space group                                     | P2 <sub>1</sub> /c                                | C 2/c                                                            |
| Unit cell dimensions                            | a = 23.010(9) Å                                   | a = 8.7336(17) Å                                                 |
|                                                 | b = 13.712(5) Å                                   | b = 16.212(6) Å                                                  |
|                                                 | c = 21.228(9) Å                                   | c = 18.952(4) Å                                                  |
|                                                 | α = 90°                                           | α = 90°                                                          |
|                                                 | β = 115.456(7)°                                   | β = 92.30(3) °                                                   |
|                                                 | γ = 90°                                           | γ = 90°                                                          |
| Volume                                          | 6048(4) Å <sup>3</sup>                            | 2681.2(13) Å <sup>3</sup>                                        |
| Z                                               | 8                                                 | 4                                                                |
| ρ(mg•m <sup>-3</sup> )                          | 1.222                                             | 1.314                                                            |
| F(000)                                          | 2352                                              | 1112                                                             |
| Crystal size(mm <sup>3</sup> )                  | 0.60 x 0.40 x 0.40                                | 0.60 x 0.40 x 0.40                                               |
| The range for data collection                   | 1.78° to 26.22°                                   | 3.31° to 27.49°                                                  |
|                                                 | -28 ≤ h ≤ 23                                      | -9 ≤ h ≤ 11                                                      |
| Limiting indices                                | -25 ≤ l ≤ 26                                      | -20 ≤ k ≤ 20                                                     |
|                                                 | -16 ≤ k ≤ 17                                      | -24 ≤ l ≤ 24                                                     |
| Reflections collected/ unique                   | 35810 / 12166                                     | 12023 / 3070                                                     |
| Data / restraints / parameters                  | 12094 / 0 / 711                                   | 3048 / 0 / 170                                                   |
| GOF                                             | 0.950                                             | 1.076                                                            |
| R1,wR2[I ≥ 2σ(I)]                               | R1 = 0.0507, wR2 = 0.1111                         | R1 = 0.0456, wR2 = 0.1289                                        |
| R1,wR2(all data)                                | R1 = 0.1290, wR2 = 0.1438                         | R1 = 0.0578, wR2 = 0.1365                                        |
| Largest diff. peak and hole(e•Å <sup>-3</sup> ) | 0.276 and -0.249                                  | 0.369 and -0.271                                                 |

**Table 2** Bond lengths (Å) and angles (°) for **2**

|            |          |
|------------|----------|
| Ti(1)-N(6) | 1.910(3) |
| Ti(1)-N(5) | 1.912(3) |

---

|             |          |
|-------------|----------|
| Ti(1)-N(4)  | 2.123(3) |
| Ti(1)-N(2)  | 2.148(3) |
| Ti(1)-N(1)  | 2.236(3) |
| Ti(1)-N(3)  | 2.277(2) |
| N(1)-C(7)   | 1.344(3) |
| N(1)-C(1)   | 1.373(4) |
| N(3)-C(18)  | 1.341(3) |
| N(3)-C(12)  | 1.377(4) |
| N(2)-C(11)  | 1.363(4) |
| N(2)-C(8)   | 1.390(4) |
| C(8)-C(9)   | 1.383(4) |
| C(8)-C(7)   | 1.439(4) |
| N(8)-C(18)  | 1.372(4) |
| N(8)-C(17)  | 1.395(4) |
| N(8)-C(13)  | 1.426(4) |
| N(7)-C(7)   | 1.363(4) |
| N(7)-C(6)   | 1.402(4) |
| N(7)-C(2)   | 1.416(4) |
| N(6)-C(29)  | 1.477(4) |
| N(6)-C(27)  | 1.485(4) |
| N(4)-C(22)  | 1.362(4) |
| N(4)-C(19)  | 1.392(4) |
| C(18)-C(19) | 1.442(4) |
| C(19)-C(20) | 1.384(4) |
| C(2)-C(1)   | 1.377(4) |
| C(2)-C(3)   | 1.420(4) |
| C(11)-C(10) | 1.383(4) |
| C(12)-C(13) | 1.377(4) |
| N(5)-C(23)  | 1.474(4) |
| N(5)-C(25)  | 1.478(4) |
| C(22)-C(21) | 1.380(4) |
| C(3)-C(4)   | 1.356(5) |
| C(17)-C(16) | 1.345(5) |
| C(6)-C(5)   | 1.347(5) |
| C(21)-C(20) | 1.407(4) |
| C(10)-C(9)  | 1.396(5) |
| C(14)-C(15) | 1.354(5) |
| C(14)-C(13) | 1.425(4) |
| C(5)-C(4)   | 1.414(5) |
| C(27)-C(28) | 1.527(4) |
| C(23)-C(24) | 1.509(5) |
| C(15)-C(16) | 1.430(5) |
| Ti(2)-N(14) | 1.912(3) |
| Ti(2)-N(13) | 1.916(3) |

---

---

|             |          |
|-------------|----------|
| Ti(2)-N(12) | 2.121(3) |
| Ti(2)-N(10) | 2.135(3) |
| Ti(2)-N(9)  | 2.252(3) |
| Ti(2)-N(11) | 2.279(3) |
| N(16)-C(48) | 1.371(4) |
| N(16)-C(47) | 1.397(4) |
| N(16)-C(43) | 1.420(4) |
| N(12)-C(52) | 1.369(4) |
| N(12)-C(49) | 1.393(4) |
| N(11)-C(48) | 1.342(4) |
| N(11)-C(42) | 1.379(4) |
| N(9)-C(37)  | 1.341(4) |
| N(9)-C(31)  | 1.376(4) |
| N(10)-C(41) | 1.365(4) |
| N(10)-C(38) | 1.388(4) |
| C(37)-N(15) | 1.369(4) |
| C(37)-C(38) | 1.439(5) |
| C(48)-C(49) | 1.444(4) |
| N(14)-C(53) | 1.470(4) |
| N(14)-C(55) | 1.479(4) |
| N(13)-C(59) | 1.473(4) |
| N(13)-C(57) | 1.480(4) |
| N(15)-C(36) | 1.405(4) |
| N(15)-C(32) | 1.406(4) |
| C(55)-C(56) | 1.538(4) |
| C(49)-C(50) | 1.380(4) |
| C(42)-C(43) | 1.367(4) |
| C(52)-C(51) | 1.379(5) |
| C(38)-C(39) | 1.393(4) |
| C(43)-C(44) | 1.426(5) |
| C(53)-C(54) | 1.530(4) |
| C(31)-C(32) | 1.382(4) |
| C(40)-C(41) | 1.379(5) |
| C(40)-C(39) | 1.399(5) |
| C(32)-C(33) | 1.430(5) |
| C(44)-C(45) | 1.360(5) |
| C(57)-C(58) | 1.519(5) |
| C(47)-C(46) | 1.345(5) |
| C(50)-C(51) | 1.406(5) |
| C(46)-C(45) | 1.432(5) |
| C(33)-C(34) | 1.367(6) |
| C(59)-C(60) | 1.503(5) |
| C(36)-C(35) | 1.341(6) |
| C(29)-C(30) | 1.518(5) |

---

---

|                  |            |
|------------------|------------|
| C(25)-C(26)      | 1.519(6)   |
| C(34)-C(35)      | 1.409(7)   |
| N(6)-Ti(1)-N(5)  | 102.32(12) |
| N(6)-Ti(1)-N(4)  | 99.70(11)  |
| N(5)-Ti(1)-N(4)  | 96.26(11)  |
| N(6)-Ti(1)-N(2)  | 97.57(11)  |
| N(5)-Ti(1)-N(2)  | 97.53(11)  |
| N(4)-Ti(1)-N(2)  | 155.02(10) |
| N(6)-Ti(1)-N(1)  | 162.79(10) |
| N(5)-Ti(1)-N(1)  | 93.69(11)  |
| N(4)-Ti(1)-N(1)  | 84.61(9)   |
| N(2)-Ti(1)-N(1)  | 73.82(10)  |
| N(6)-Ti(1)-N(3)  | 88.51(10)  |
| N(5)-Ti(1)-N(3)  | 167.17(11) |
| N(4)-Ti(1)-N(3)  | 74.90(10)  |
| N(2)-Ti(1)-N(3)  | 87.69(10)  |
| N(1)-Ti(1)-N(3)  | 76.45(9)   |
| C(7)-N(1)-C(1)   | 107.8(3)   |
| C(7)-N(1)-Ti(1)  | 115.1(2)   |
| C(1)-N(1)-Ti(1)  | 137.0(2)   |
| C(18)-N(3)-C(12) | 107.4(3)   |
| C(18)-N(3)-Ti(1) | 112.18(19) |
| C(12)-N(3)-Ti(1) | 140.1(2)   |
| C(11)-N(2)-C(8)  | 105.9(3)   |
| C(11)-N(2)-Ti(1) | 134.7(2)   |
| C(8)-N(2)-Ti(1)  | 119.14(19) |
| C(9)-C(8)-N(2)   | 110.2(3)   |
| C(9)-C(8)-C(7)   | 136.2(3)   |
| N(2)-C(8)-C(7)   | 113.5(3)   |
| C(18)-N(8)-C(17) | 131.3(3)   |
| C(18)-N(8)-C(13) | 107.5(2)   |
| C(17)-N(8)-C(13) | 121.2(3)   |
| C(7)-N(7)-C(6)   | 131.0(3)   |
| C(7)-N(7)-C(2)   | 107.8(2)   |
| C(6)-N(7)-C(2)   | 121.1(3)   |
| C(29)-N(6)-C(27) | 114.1(3)   |
| C(29)-N(6)-Ti(1) | 127.6(2)   |
| C(27)-N(6)-Ti(1) | 116.5(2)   |
| C(22)-N(4)-C(19) | 105.6(3)   |
| C(22)-N(4)-Ti(1) | 135.2(2)   |
| C(19)-N(4)-Ti(1) | 118.82(19) |
| N(3)-C(18)-N(8)  | 110.0(3)   |
| N(3)-C(18)-C(19) | 119.9(3)   |
| N(8)-C(18)-C(19) | 130.1(3)   |

---

---

|                   |            |
|-------------------|------------|
| C(20)-C(19)-N(4)  | 110.5(3)   |
| C(20)-C(19)-C(18) | 135.9(3)   |
| N(4)-C(19)-C(18)  | 113.7(3)   |
| C(1)-C(2)-N(7)    | 105.2(3)   |
| C(1)-C(2)-C(3)    | 136.8(3)   |
| N(7)-C(2)-C(3)    | 118.0(3)   |
| N(2)-C(11)-C(10)  | 110.3(3)   |
| N(3)-C(12)-C(13)  | 110.4(3)   |
| C(23)-N(5)-C(25)  | 113.4(3)   |
| C(23)-N(5)-Ti(1)  | 124.2(2)   |
| C(25)-N(5)-Ti(1)  | 121.0(2)   |
| N(1)-C(1)-C(2)    | 109.6(3)   |
| N(1)-C(7)-N(7)    | 109.5(3)   |
| N(1)-C(7)-C(8)    | 118.4(3)   |
| N(7)-C(7)-C(8)    | 132.1(3)   |
| N(4)-C(22)-C(21)  | 110.8(3)   |
| C(4)-C(3)-C(2)    | 119.9(4)   |
| C(16)-C(17)-N(8)  | 119.5(4)   |
| C(5)-C(6)-N(7)    | 118.8(3)   |
| C(22)-C(21)-C(20) | 107.3(3)   |
| C(11)-C(10)-C(9)  | 107.4(3)   |
| C(8)-C(9)-C(10)   | 106.3(3)   |
| C(15)-C(14)-C(13) | 119.7(4)   |
| C(6)-C(5)-C(4)    | 121.6(3)   |
| C(19)-C(20)-C(21) | 105.9(3)   |
| N(6)-C(27)-C(28)  | 114.2(3)   |
| C(3)-C(4)-C(5)    | 120.5(4)   |
| N(5)-C(23)-C(24)  | 114.7(3)   |
| C(14)-C(15)-C(16) | 121.0(4)   |
| C(17)-C(16)-C(15) | 120.8(4)   |
| N(14)-Ti(2)-N(13) | 104.39(11) |
| N(14)-Ti(2)-N(12) | 97.78(10)  |
| N(13)-Ti(2)-N(12) | 94.76(11)  |
| N(14)-Ti(2)-N(10) | 94.38(11)  |
| N(13)-Ti(2)-N(10) | 98.40(11)  |
| N(12)-Ti(2)-N(10) | 159.28(10) |
| N(14)-Ti(2)-N(9)  | 160.18(10) |
| N(13)-Ti(2)-N(9)  | 93.54(11)  |
| N(12)-Ti(2)-N(9)  | 88.91(10)  |
| N(10)-Ti(2)-N(9)  | 74.41(10)  |
| N(14)-Ti(2)-N(11) | 87.77(10)  |
| N(13)-Ti(2)-N(11) | 164.82(10) |
| N(12)-Ti(2)-N(11) | 74.31(10)  |
| N(10)-Ti(2)-N(11) | 89.53(10)  |

---

---

|                   |          |
|-------------------|----------|
| N(9)-Ti(2)-N(11)  | 76.06(9) |
| C(48)-N(16)-C(47) | 130.8(3) |
| C(48)-N(16)-C(43) | 107.4(3) |
| C(47)-N(16)-C(43) | 121.8(3) |
| C(52)-N(12)-C(49) | 105.5(3) |
| C(52)-N(12)-Ti(2) | 134.3(2) |
| C(49)-N(12)-Ti(2) | 119.7(2) |
| C(48)-N(11)-C(42) | 107.5(3) |
| C(48)-N(11)-Ti(2) | 112.8(2) |
| C(42)-N(11)-Ti(2) | 139.6(2) |
| C(37)-N(9)-C(31)  | 107.7(3) |
| C(37)-N(9)-Ti(2)  | 113.1(2) |
| C(31)-N(9)-Ti(2)  | 139.1(2) |
| C(41)-N(10)-C(38) | 105.3(3) |
| C(41)-N(10)-Ti(2) | 135.1(2) |
| C(38)-N(10)-Ti(2) | 119.5(2) |
| N(9)-C(37)-N(15)  | 109.5(3) |
| N(9)-C(37)-C(38)  | 120.3(3) |
| N(15)-C(37)-C(38) | 130.1(3) |
| N(11)-C(48)-N(16) | 109.7(3) |
| N(11)-C(48)-C(49) | 119.6(3) |
| N(16)-C(48)-C(49) | 130.7(3) |
| C(53)-N(14)-C(55) | 114.3(2) |
| C(53)-N(14)-Ti(2) | 125.1(2) |
| C(55)-N(14)-Ti(2) | 118.2(2) |
| C(59)-N(13)-C(57) | 113.6(3) |
| C(59)-N(13)-Ti(2) | 122.5(2) |
| C(57)-N(13)-Ti(2) | 122.9(2) |
| C(37)-N(15)-C(36) | 130.0(4) |
| C(37)-N(15)-C(32) | 108.0(3) |
| C(36)-N(15)-C(32) | 122.0(3) |
| N(14)-C(55)-C(56) | 114.6(3) |
| C(50)-C(49)-N(12) | 110.3(3) |
| C(50)-C(49)-C(48) | 136.3(3) |
| N(12)-C(49)-C(48) | 113.3(3) |
| C(43)-C(42)-N(11) | 110.0(3) |
| N(12)-C(52)-C(51) | 110.8(3) |
| N(10)-C(38)-C(39) | 110.0(3) |
| N(10)-C(38)-C(37) | 112.7(3) |
| C(39)-C(38)-C(37) | 137.1(3) |
| C(42)-C(43)-N(16) | 105.4(3) |
| C(42)-C(43)-C(44) | 136.9(4) |
| N(16)-C(43)-C(44) | 117.7(3) |
| N(14)-C(53)-C(54) | 115.5(3) |

---

|                   |          |
|-------------------|----------|
| N(9)-C(31)-C(32)  | 109.5(3) |
| C(41)-C(40)-C(39) | 106.4(3) |
| C(31)-C(32)-N(15) | 105.3(3) |
| C(31)-C(32)-C(33) | 136.8(4) |
| N(15)-C(32)-C(33) | 117.9(4) |
| C(45)-C(44)-C(43) | 119.8(4) |
| N(10)-C(41)-C(40) | 111.6(3) |
| N(13)-C(57)-C(58) | 114.0(3) |
| C(38)-C(39)-C(40) | 106.7(3) |
| C(46)-C(47)-N(16) | 119.0(4) |
| C(49)-C(50)-C(51) | 106.4(3) |
| C(52)-C(51)-C(50) | 107.0(3) |
| C(47)-C(46)-C(45) | 121.2(4) |
| C(34)-C(33)-C(32) | 119.1(5) |
| N(13)-C(59)-C(60) | 116.3(3) |
| C(44)-C(45)-C(46) | 120.6(4) |
| C(35)-C(36)-N(15) | 118.1(5) |
| N(6)-C(29)-C(30)  | 114.8(3) |
| N(5)-C(25)-C(26)  | 115.7(4) |
| C(12)-C(13)-N(8)  | 104.8(3) |
| C(12)-C(13)-C(14) | 137.3(3) |
| N(8)-C(13)-C(14)  | 117.9(3) |
| C(33)-C(34)-C(35) | 120.7(5) |
| C(36)-C(35)-C(34) | 122.2(5) |

**Table 3** Bond lengths (Å) and angles (°) for **3**

|             |            |
|-------------|------------|
| Ti(1)-O(1A) | 1.7798(13) |
| Ti(1)-O(1)  | 1.7799(13) |



---

|                   |            |
|-------------------|------------|
| Ti(1)-N(2)        | 2.1003(16) |
| Ti(1)-N(2A)       | 2.1004(16) |
| Ti(1)-N(1A)       | 2.2209(15) |
| Ti(1)-N(1)        | 2.2209(16) |
| O(1)-C(12)        | 1.418(2)   |
| N(3)-C(7)         | 1.362(2)   |
| N(3)-C(6)         | 1.397(2)   |
| N(3)-C(2)         | 1.404(3)   |
| N(2)-C(11)        | 1.369(3)   |
| N(2)-C(8)         | 1.377(2)   |
| N(1)-C(7)         | 1.332(2)   |
| N(1)-C(1)         | 1.365(2)   |
| C(7)-C(8)         | 1.432(2)   |
| C(2)-C(1)         | 1.371(3)   |
| C(2)-C(3)         | 1.419(3)   |
| C(8)-C(9)         | 1.378(3)   |
| C(4)-C(3)         | 1.352(3)   |
| C(4)-C(5)         | 1.420(4)   |
| C(4)-H(4)         | 0.9300     |
| C(12)-C(13)       | 1.486(3)   |
| C(12)-C(14)       | 1.497(4)   |
| C(12)-H(12)       | 0.9800     |
| C(1)-H(1)         | 0.9300     |
| C(6)-C(5)         | 1.334(3)   |
| C(6)-H(6)         | 0.9300     |
| C(14)-H(14A)      | 0.9600     |
| C(14)-H(14B)      | 0.9600     |
| C(14)-H(14C)      | 0.9600     |
| C(11)-C(10)       | 1.364(3)   |
| C(11)-H(11)       | 0.9300     |
| C(3)-H(3)         | 0.9300     |
| C(5)-H(5)         | 0.9300     |
| C(10)-C(9)        | 1.393(4)   |
| C(10)-H(10)       | 0.9300     |
| C(9)-H(9)         | 0.9300     |
| C(13)-H(13A)      | 0.9600     |
| C(13)-H(13B)      | 0.9600     |
| C(13)-H(13C)      | 0.9600     |
| O(1A)-Ti(1)-O(1)  | 100.41(9)  |
| O(1A)-Ti(1)-N(2)  | 95.96(6)   |
| O(1)-Ti(1)-N(2)   | 103.11(6)  |
| O(1A)-Ti(1)-N(2A) | 103.11(6)  |
| O(1)-Ti(1)-N(2A)  | 95.96(6)   |
| N(2)-Ti(1)-N(2A)  | 150.07(9)  |

---

---

|                    |            |
|--------------------|------------|
| O(1)A-Ti(1)-N(1A)  | 90.02(6)   |
| O(1)-Ti(1)-N(1A)   | 167.20(6)  |
| N(2)-Ti(1)-N(1A)   | 82.96(6)   |
| N(2A)-Ti(1)-N(1A)  | 74.28(6)   |
| O(1A)-Ti(1)-N(1)   | 167.20(6)  |
| O(1)-Ti(1)-N(1)    | 90.02(6)   |
| N(2)-Ti(1)-N(1)    | 74.28(6)   |
| N(2A)-Ti(1)-N(1)   | 82.96(6)   |
| N(1A)-Ti(1)-N(1)   | 80.70(8)   |
| C(12)-O(1)-Ti(1)   | 147.87(12) |
| C(7)-N(3)-C(6)     | 130.78(18) |
| C(7)-N(3)-C(2)     | 107.49(15) |
| C(6)-N(3)-C(2)     | 121.72(17) |
| C(11)-N(2)-C(8)    | 106.06(16) |
| C(11)-N(2)-Ti(1)   | 133.12(14) |
| C(8)-N(2)-Ti(1)    | 119.83(12) |
| C(7)-N(1)-C(1)     | 108.13(15) |
| C(7)-N(1)-Ti(1)    | 114.08(11) |
| C(1)-N(1)-Ti(1)    | 137.78(12) |
| N(1)-C(7)-N(3)     | 109.51(15) |
| N(1)-C(7)-C(8)     | 118.87(15) |
| N(3)-C(7)-C(8)     | 131.58(16) |
| C(1)-C(2)-N(3)     | 105.68(16) |
| C(1)-C(2)-C(3)     | 136.4(2)   |
| N(3)-C(2)-C(3)     | 117.79(19) |
| N(2)-C(8)-C(9)     | 109.94(17) |
| N(2)-C(8)-C(7)     | 112.75(15) |
| C(9)-C(8)-C(7)     | 137.00(18) |
| C(3)-C(4)-C(5)     | 120.4(2)   |
| C(3)-C(4)-H(4)     | 119.8      |
| C(5)-C(4)-H(4)     | 119.8      |
| O(1)-C(12)-C(13)   | 109.26(19) |
| O(1)-C(12)-C(14)   | 109.4(2)   |
| C(13)-C(12)-C(14)  | 113.0(2)   |
| O(1)-C(12)-H(12)   | 108.4      |
| C(13)-C(12)-H(12)  | 108.4      |
| C(14)-C(12)-H(12)  | 108.4      |
| N(1)-C(1)-C(2)     | 109.18(17) |
| N(1)-C(1)-H(1)     | 125.4      |
| C(2)-C(1)-H(1)     | 125.4      |
| C(5)-C(6)-N(3)     | 118.7(2)   |
| C(5)-C(6)-H(6)     | 120.6      |
| N(3)-C(6)-H(6)     | 120.6      |
| C(12)-C(14)-H(14A) | 109.5      |

---

---

|                     |          |
|---------------------|----------|
| C(12)-C(14)-H(14B)  | 109.5    |
| H(14A)-C(14)-H(14B) | 109.5    |
| C(12)-C(14)-H(14C)  | 109.5    |
| H(14A)-C(14)-H(14C) | 109.5    |
| H(14B)-C(14)-H(14C) | 109.5    |
| C(10)-C(11)-N(2)    | 110.0(2) |
| C(10)-C(11)-H(11)   | 125.0    |
| N(2)-C(11)-H(11)    | 125.0    |
| C(4)-C(3)-C(2)      | 119.8(2) |
| C(4)-C(3)-H(3)      | 120.1    |
| C(2)-C(3)-H(3)      | 120.1    |
| C(6)-C(5)-C(4)      | 121.5(2) |
| C(6)-C(5)-H(5)      | 119.2    |
| C(4)-C(5)-H(5)      | 119.2    |
| C(11)-C(10)-C(9)    | 107.6(2) |
| C(11)-C(10)-H(10)   | 126.2    |
| C(9)-C(10)-H(10)    | 126.2    |
| C(8)-C(9)-C(10)     | 106.3(2) |
| C(8)-C(9)-H(9)      | 126.8    |
| C(10)-C(9)-H(9)     | 126.8    |
| C(12)-C(13)-H(13A)  | 109.5    |
| C(12)-C(13)-H(13B)  | 109.5    |
| H(13A)-C(13)-H(13B) | 109.5    |
| C(12)-C(13)-H(13C)  | 109.5    |
| H(13A)-C(13)-H(13C) | 109.5    |
| H(13B)-C(13)-H(13C) | 109.5    |

---

## 2. $^1\text{H}$ and $^{13}\text{C}$ NMR spectra for the complexes

### 2.1 $^1\text{H}$ and $^{13}\text{C}$ NMR spectra for HL

$^1\text{H}$  NMR (400 MHz,  $\text{CDCl}_3$ )  $\delta$  12.14 (s, 1H), 8.39 – 8.28 (m, 1H), 7.51 (s, 1H), 7.45 (d, 1H), 7.02 (d, 1H), 6.76 – 6.58 (m, 3H), 6.41 (dd, 1H);  $^{13}\text{C}$  NMR (101 MHz,  $\text{CDCl}_3$ )  $\delta$  133.32, 130.71, 122.01, 119.86, 119.21, 118.72, 118.33, 113.31, 109.16, 106.07.

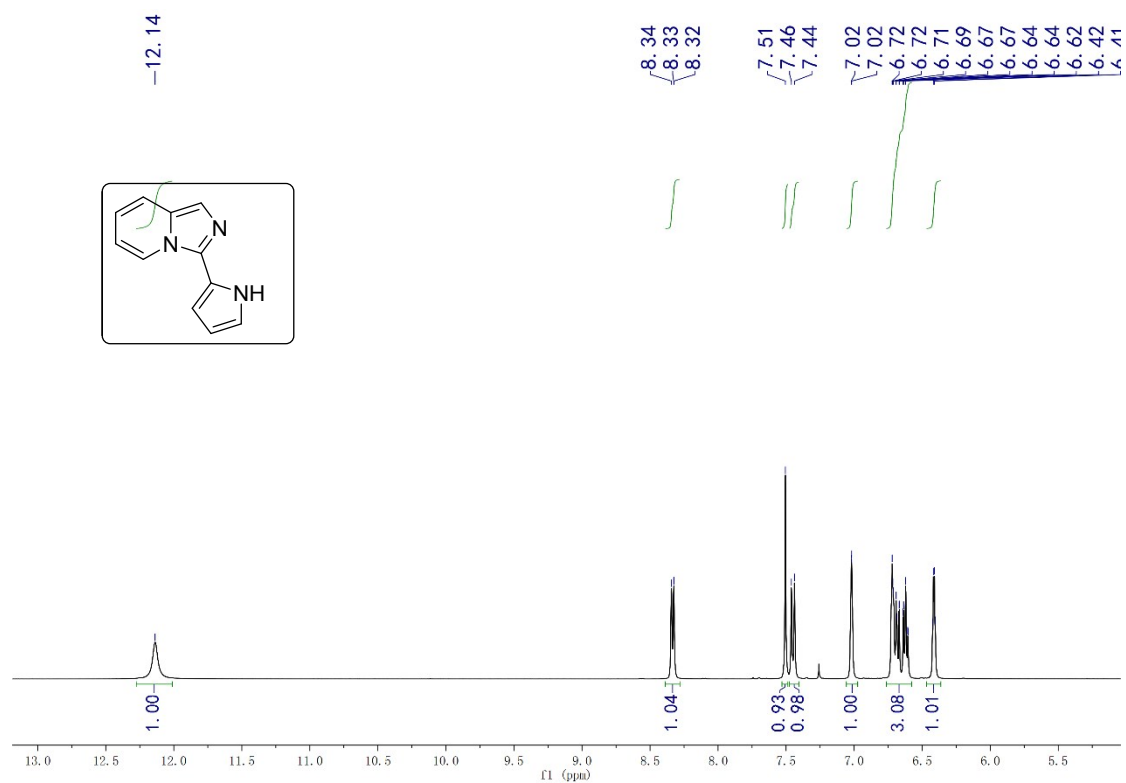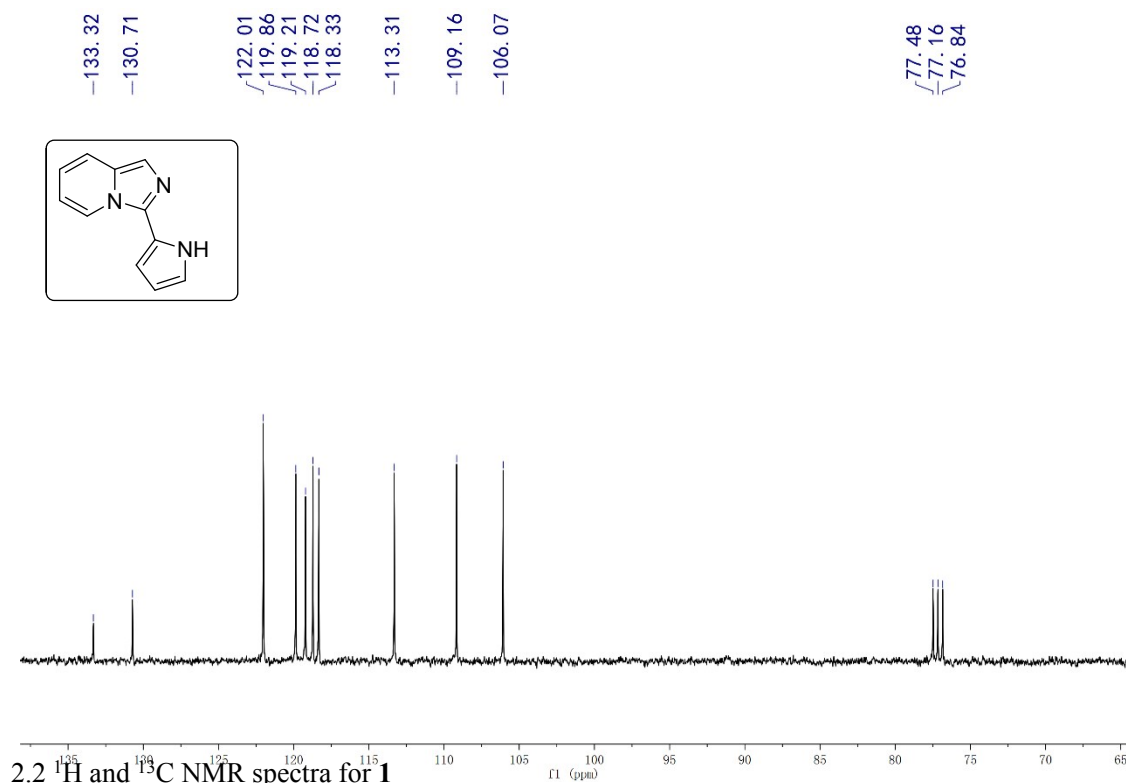

## 2.2 $^1\text{H}$ and $^{13}\text{C}$ NMR spectra for **1**

$^1\text{H}$  NMR (400 MHz,  $\text{CDCl}_3$ )  $\delta$  7.93 (d, 2H,  $\text{C}_7\text{H}_5\text{N}_2$ ), 7.54 (s, 2H,  $\text{C}_7\text{H}_5\text{N}_2$ ), 7.06 (d, 2H,  $\text{C}_7\text{H}_5\text{N}_2$ ), 6.62 (d, 2H, pyrrole-H), 6.53 – 6.39 (m, 6H,  $\text{C}_7\text{H}_5\text{N}_2$  + pyrrole-H), 6.28 (s, 2H, pyrrole-H), 3.35 (s, 12H,  $\text{CH}_3$ ).  $^{13}\text{C}$  NMR

(100 MHz, CDCl<sub>3</sub>) δ 138.41, 130.93, 129.01, 128.70, 122.06, 119.09, 117.65, 115.87, 113.31, 108.90, 103.68, 68.17, 47.37.

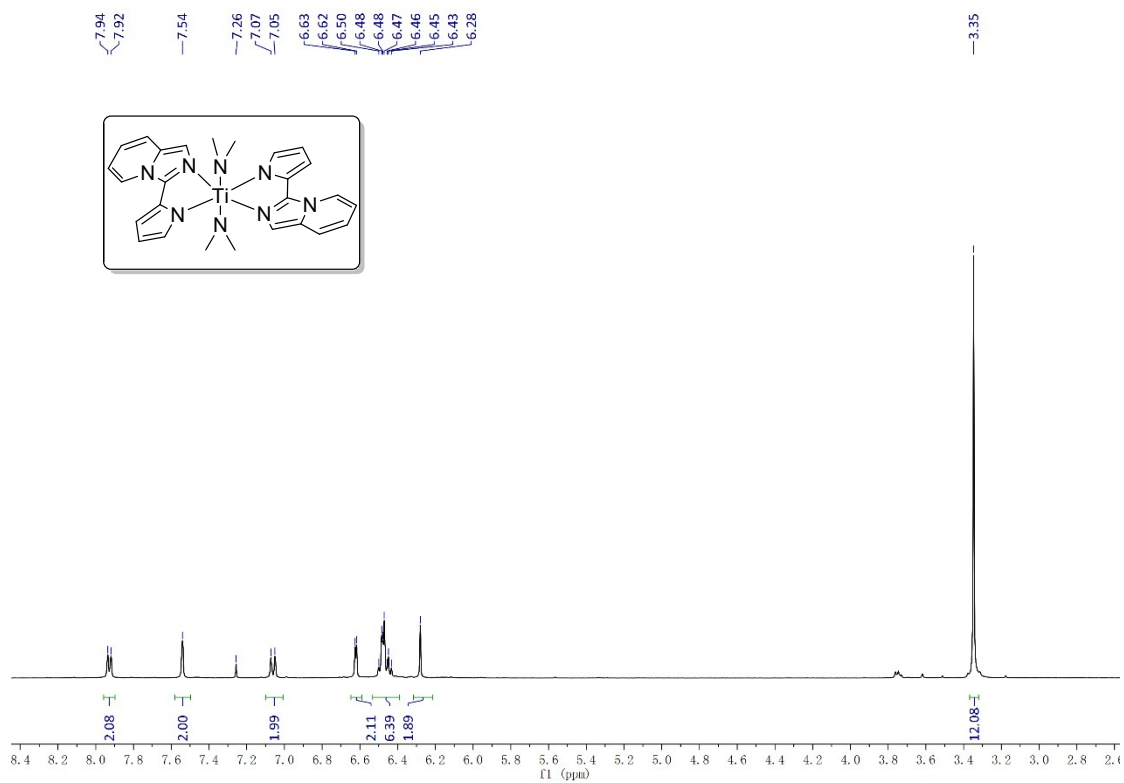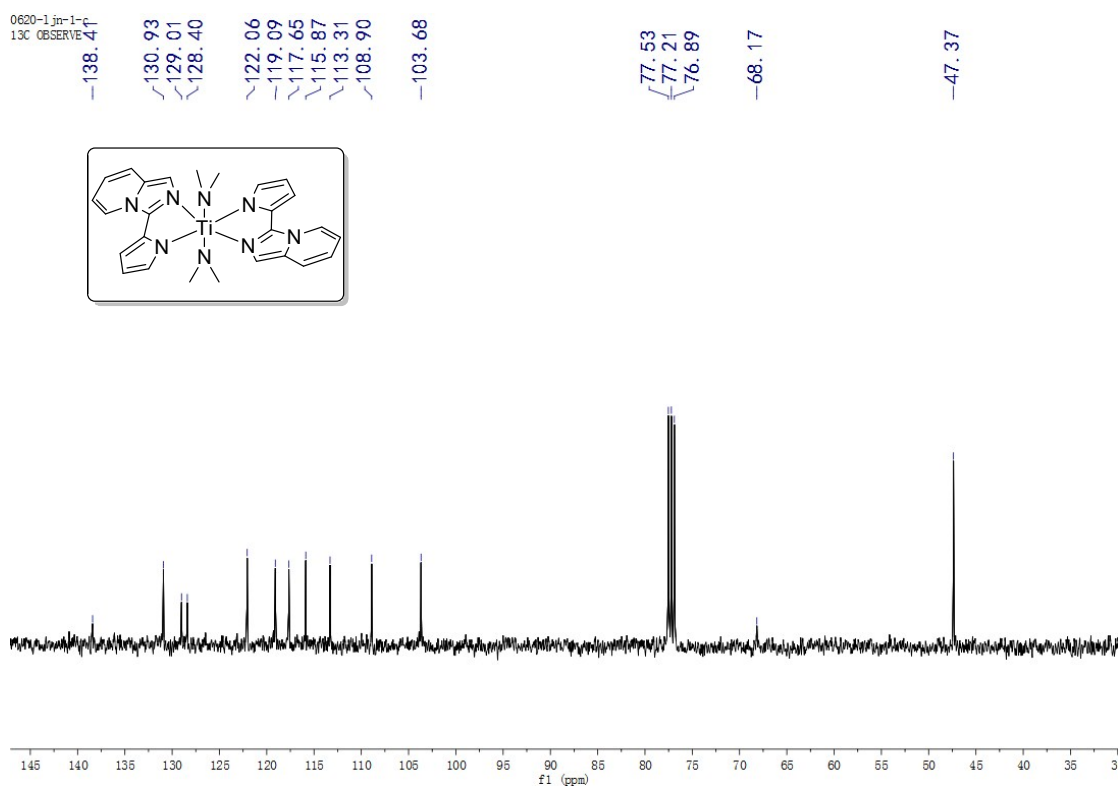

2.3 <sup>1</sup>H and <sup>13</sup>C NMR spectra for 2

$^1\text{H}$  NMR (400 MHz,  $\text{CDCl}_3$ )  $\delta$  7.94 (d, 2H,  $\text{C}_7\text{H}_5\text{N}_2$ ), 7.61 (s, 2H,  $\text{C}_7\text{H}_5\text{N}_2$ ), 7.06 (d, 2H,  $\text{C}_7\text{H}_5\text{N}_2$ ), 6.62 (d, 2H, pyrrole-H), 6.47 (dd, 8H,  $\text{C}_7\text{H}_5\text{N}_2$  + pyrrole-H), 4.22 – 3.74 (m, 8H,  $\text{CH}_2$ ), 0.62 (t, 12H,  $\text{CH}_3$ ).  $^{13}\text{C}$  NMR (101 MHz,  $\text{CDCl}_3$ )  $\delta$  137.92, 131.65, 128.84, 128.25, 121.99, 118.92, 117.44, 115.76, 113.05, 108.71, 103.24, 45.21, 12.82.

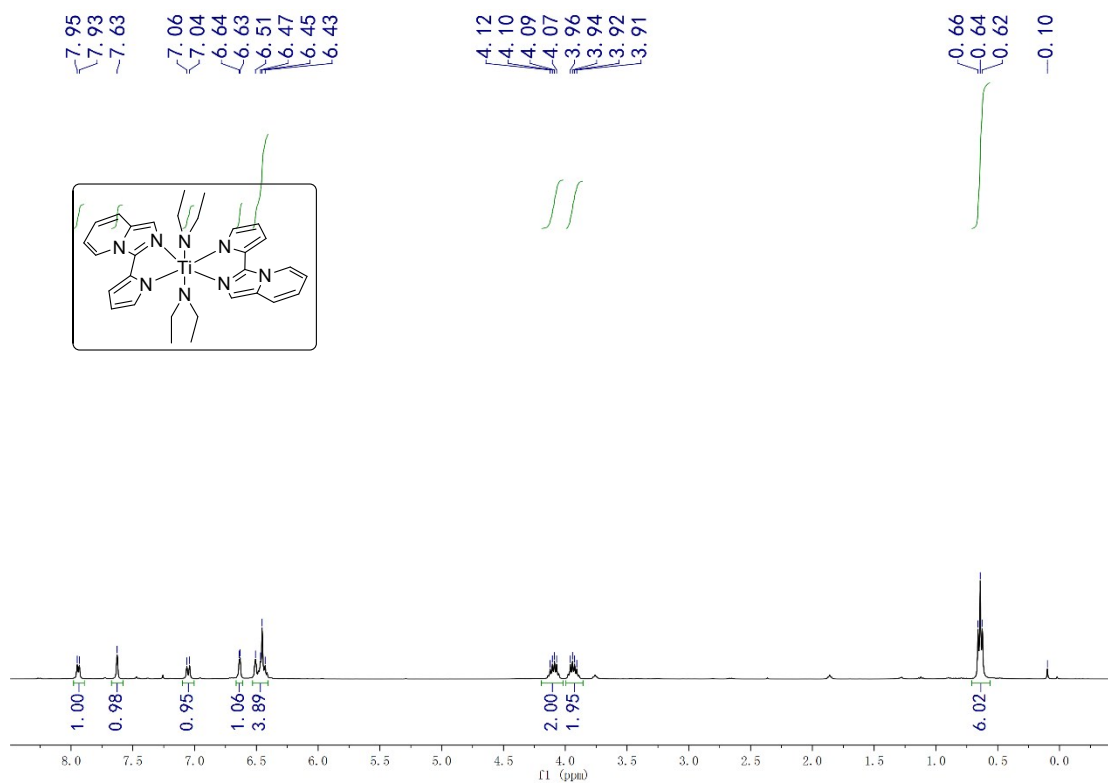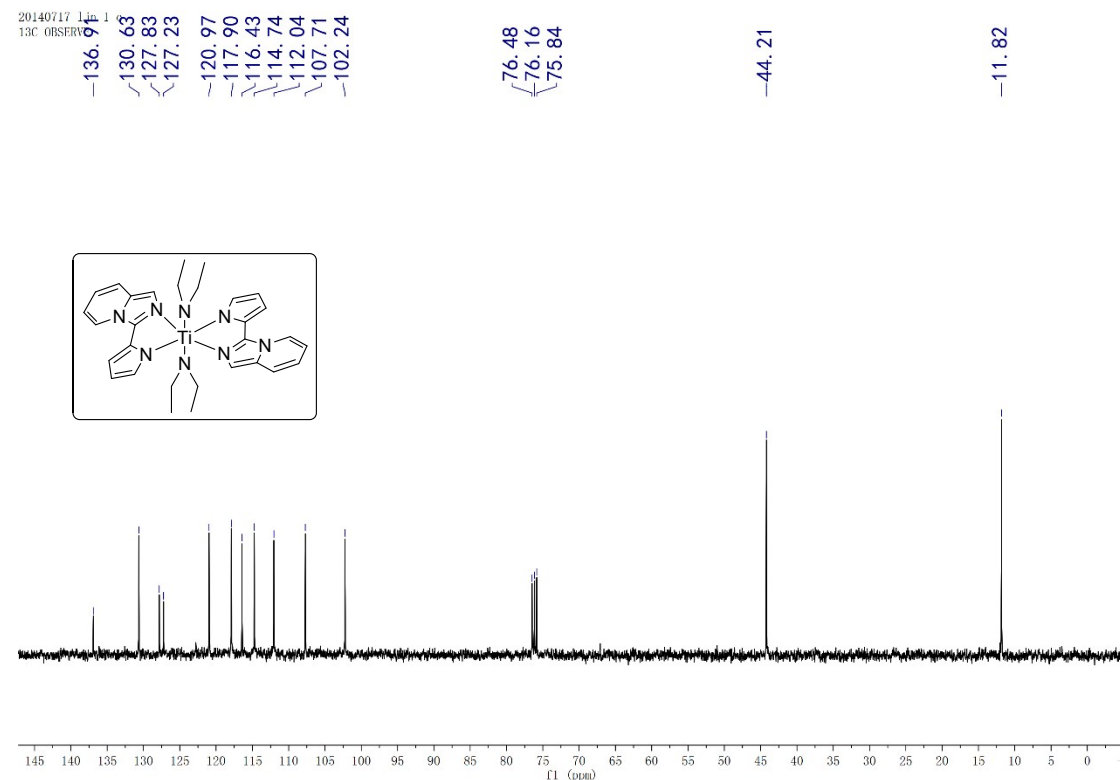

2.4  $^1\text{H}$  and  $^{13}\text{C}$  NMR spectra for 3

$^1\text{H}$  NMR (400 MHz,  $\text{CDCl}_3$ )  $\delta$  7.89 (d, 2H,  $\text{C}_7\text{H}_5\text{N}_2$ ), 7.51 (d, 2H,  $\text{C}_7\text{H}_5\text{N}_2$ ), 7.15 – 7.00 (m, 2H,  $\text{C}_7\text{H}_5\text{N}_2$ ), 6.59 (d, 2H, pyrrole-H), 6.52 – 6.38 (m, 6H,  $\text{C}_7\text{H}_5\text{N}_2$  + pyrrole-H), 6.20 (s, 2H, pyrrole-H), 4.79 – 4.58 (m, 2H, CH), 1.17 (d, 6H,  $\text{CH}_3$ ), 1.00 (d, 3H,  $\text{CH}_3$ ).  $^{13}\text{C}$  NMR (101 MHz,  $\text{CDCl}_3$ )  $\delta$  138.63, 132.05, 128.74, 128.21, 121.92, 119.15, 117.76, 115.90, 113.49, 108.42, 103.41, 79.19, 25.55.

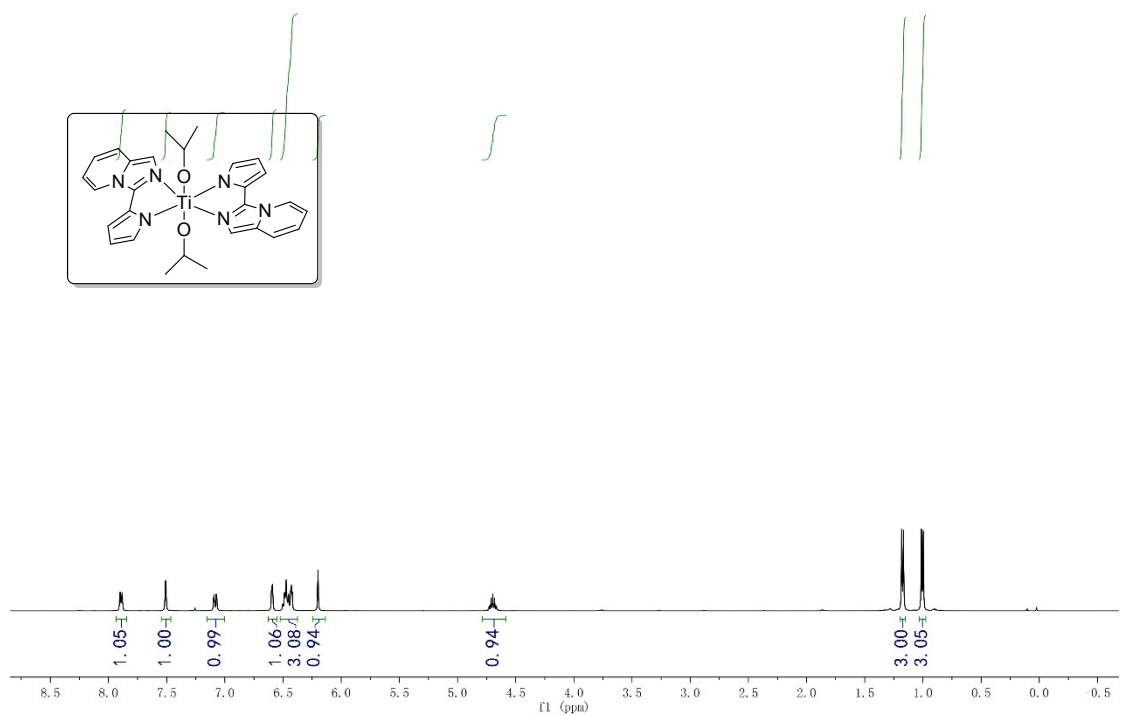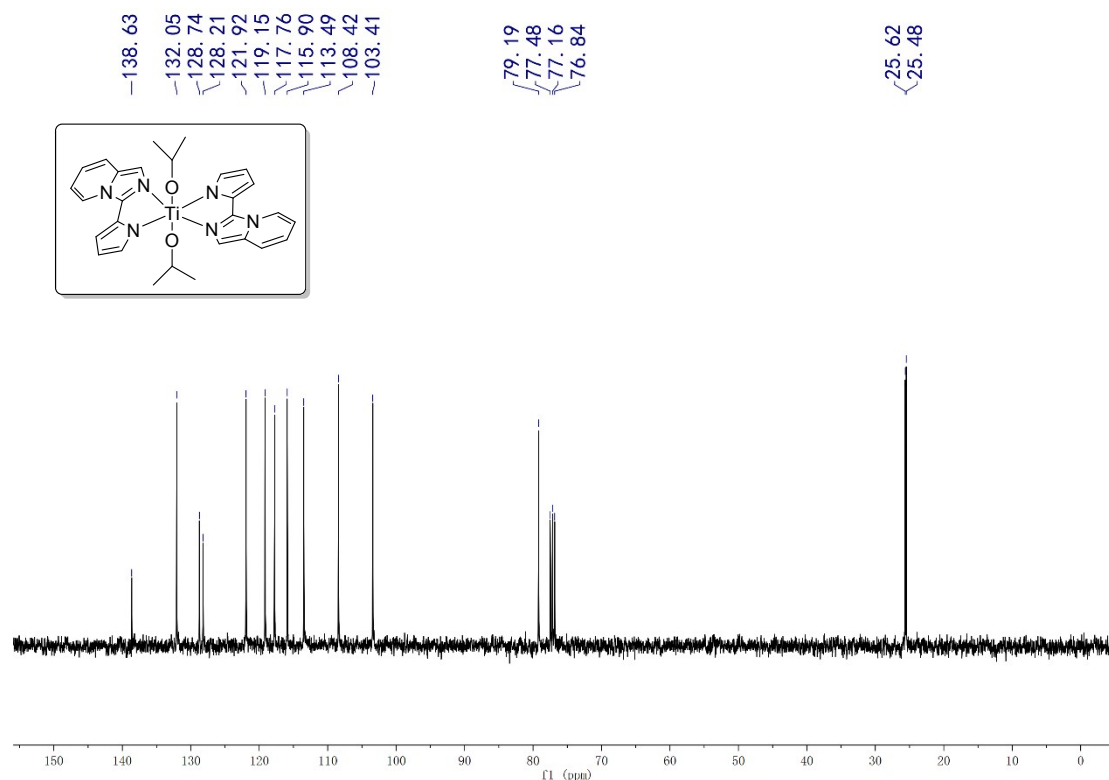

### 3. $^{13}\text{C}$ NMR spectra for the hydroamination products

### 3.1 4-bromo-N-(hexan-2-yl)aniline

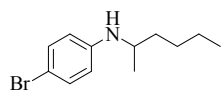

$^1\text{H NMR}$  (400 MHz,  $\text{CDCl}_3$ )  $\delta$  7.20 (d, 2H, *m*- $\text{C}_6\text{H}_4$ ), 6.50 (d, 2H, *o*- $\text{C}_6\text{H}_4$ ), 3.38 (dd, 2H, -NCH-, -NH-), 1.49 – 3H,  $\text{CH}_3$ ), 0.89 (t, 3H,  $\text{CH}_3$ ).

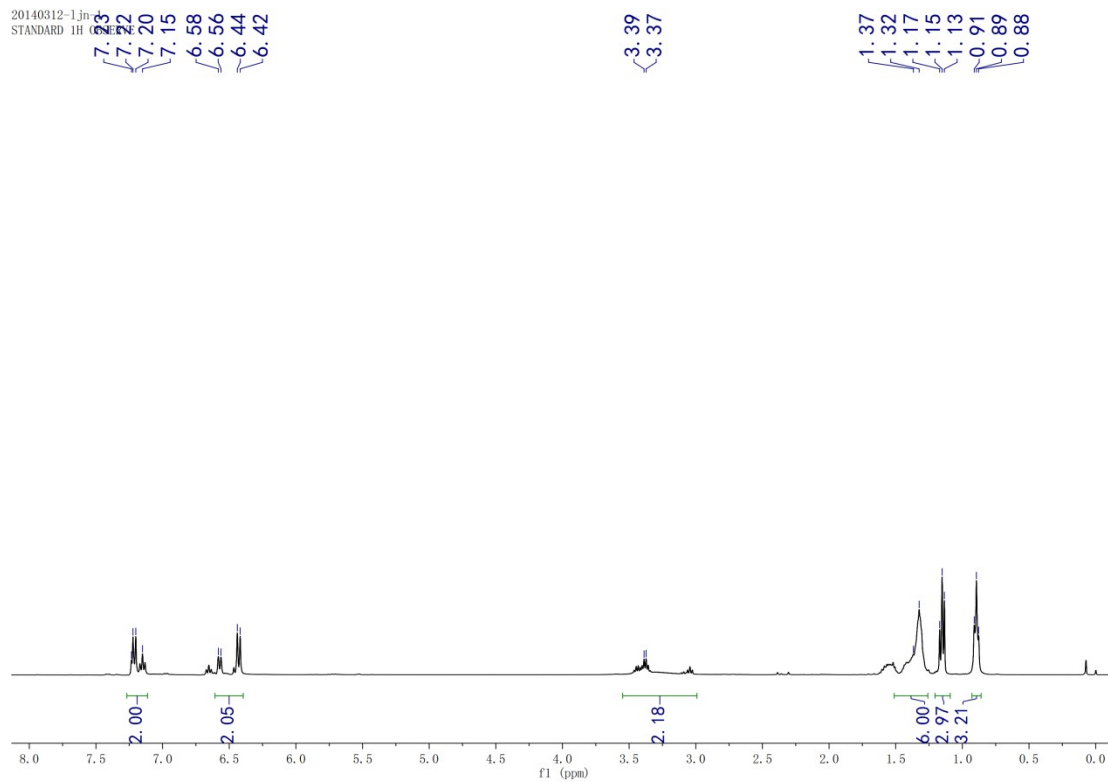

### 3.2 4-bromo-N-(octan-2-yl)aniline



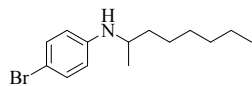

$^1\text{H NMR}$  (400 MHz,  $\text{CDCl}_3$ )  $\delta$  7.31 – 7.17 (m, 2H, Ar-H), 6.73 – 6.57 (m, 1H, Ar-H), 6.47 (d, 1H, Ar-H), 3.42 (d, 2H, NH, CH), 1.46 – 1.25 (m, 10H,  $\text{CH}_2$ ), 1.20 (d, 3H,  $\text{CH}_3$ ), 0.93 (d, 3H,  $\text{CH}_3$ ).

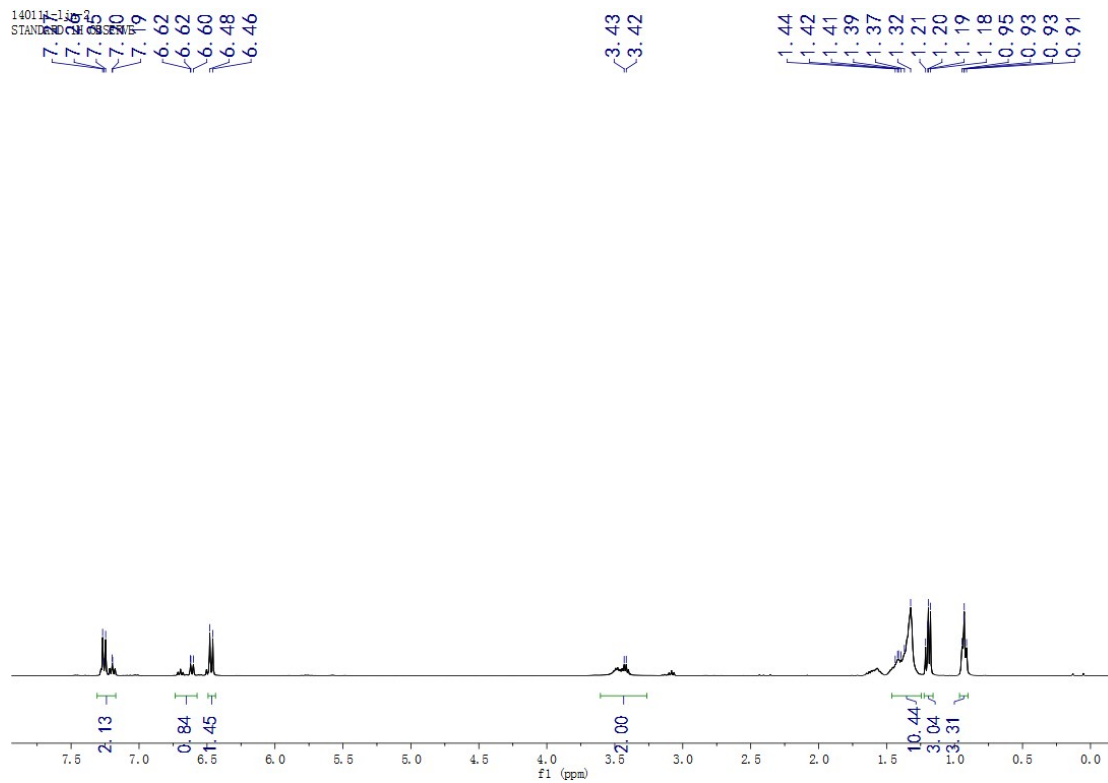

### 3.3 4-chloro-N-(octan-2-yl)aniline

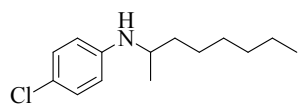

$^1\text{H NMR}$  (400 MHz,  $\text{CDCl}_3$ )  $\delta$  7.17 – 6.95 (m, 2H, Ar-H), 6.48 (t, 2H, Ar-H), 3.58 – 2.92 (m, 2H, NH, CH), 1.31 (d, 10H,  $\text{CH}_2$ ), 1.14 (d, 3H,  $\text{CH}_3$ ), 0.88 (t, 3H,  $\text{CH}_3$ ).

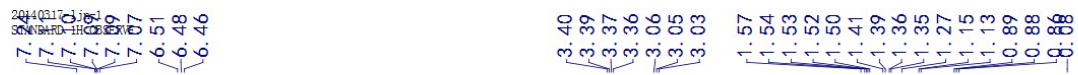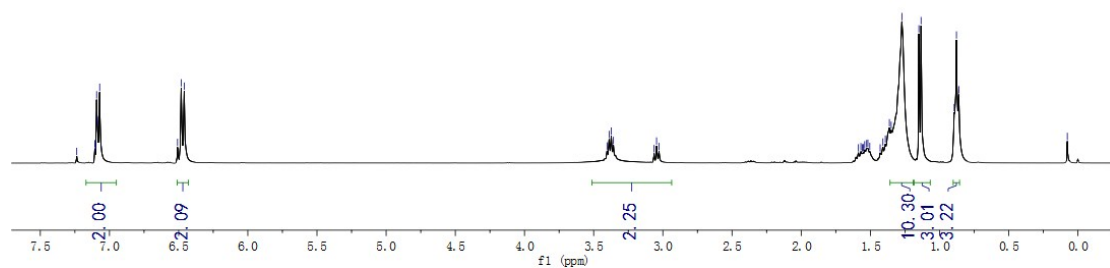

### 3.4 2-chloro-N-(octan-2-yl)aniline

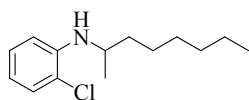

$^1\text{H NMR}$  (400 MHz,  $\text{CDCl}_3$ )  $\delta$  7.17 – 6.95 (m, 2H, Ar-H), 6.48 (t, 2H, Ar-H), 3.58 – 2.92 (m, 2H, NH, CH), 1.31 (d, 10H,  $\text{CH}_2$ ), 1.14 (d, 3H,  $\text{CH}_2$ ), 0.88 (t, 3H,  $\text{CH}_3$ ).

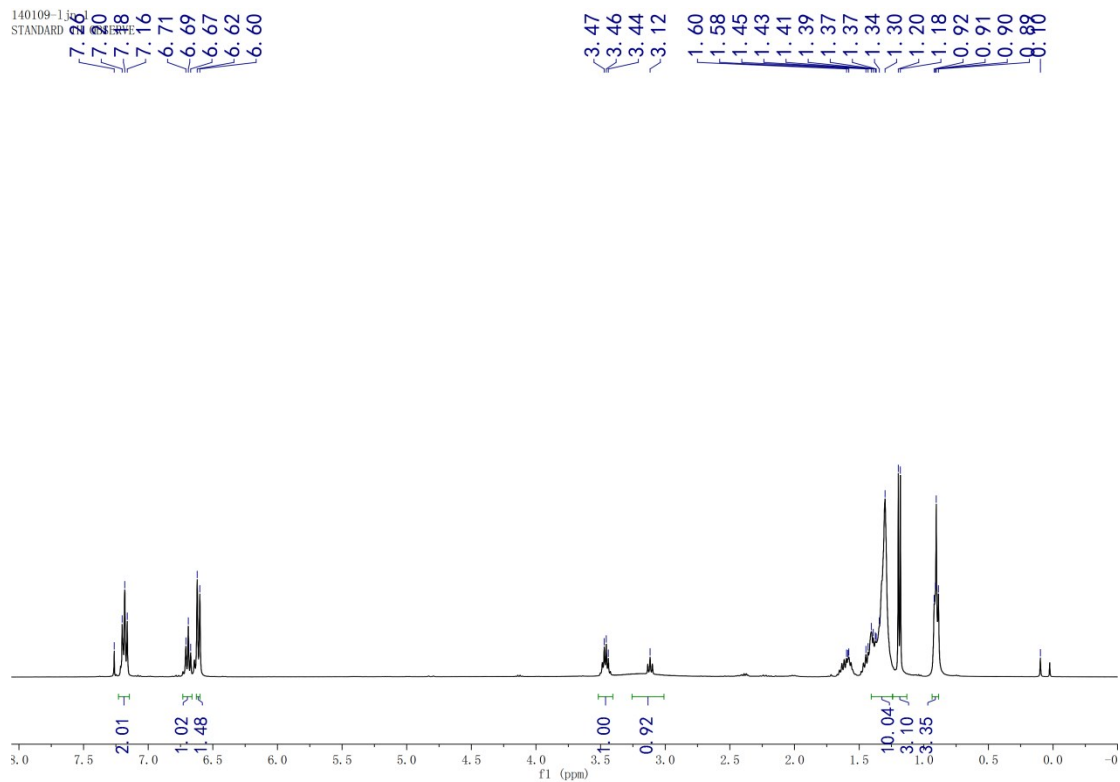

### 3.5 N-(2-Octyl)-2,4-dichloroaniline

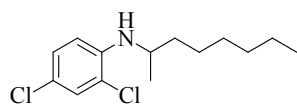

$^1\text{H NMR}$  (400 MHz,  $\text{CDCl}_3$ )  $\delta$  7.23 (d, 1H, Ar-H), 7.07 (dd, 1H, Ar-H), 6.54 (d, 1H, Ar-H), 4.07 (s, 1H, NH), 3.44 (s, 1H, CH), 1.41 – 1.24 (m, 10H,  $\text{CH}_2$ ), 1.19 (d, 3H,  $\text{CH}_3$ ), 0.87 (d, 3H,  $\text{CH}_3$ ).

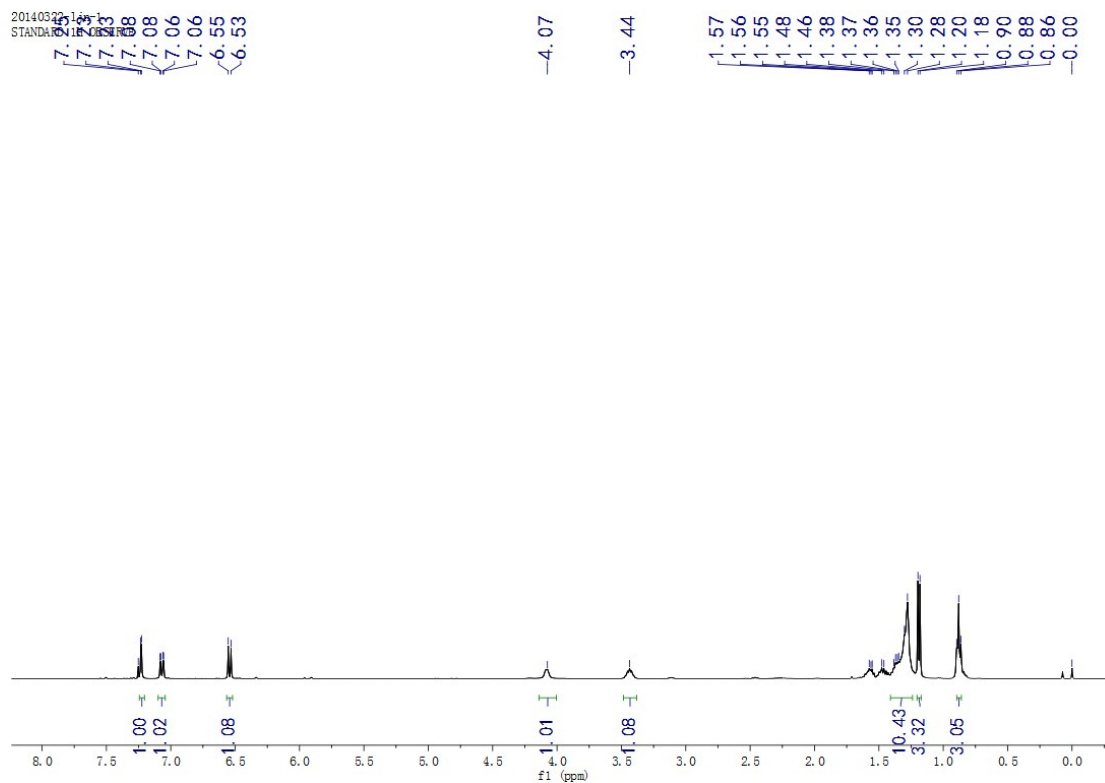

### 3.6 N-(2-Octyl)-3,4-dichloroaniline

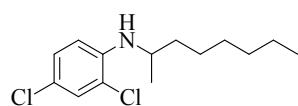

$^1\text{H NMR}$  (400 MHz,  $\text{CDCl}_3$ )  $\delta$  7.16 (dd, 1H, Ar-H), 6.63 (d, 1H, Ar-H), 6.39 (dd, 1H, )Ar-H, 3.74 – 3.42 (m, 1H, NH), 3.44 – 3.31 (m, 1H, CH), 1.34 (d, 10H,  $\text{CH}_2$ ), 1.16 (d, 3H,  $\text{CH}_3$ ), 0.91 (t, 3H,  $\text{CH}_3$ ).

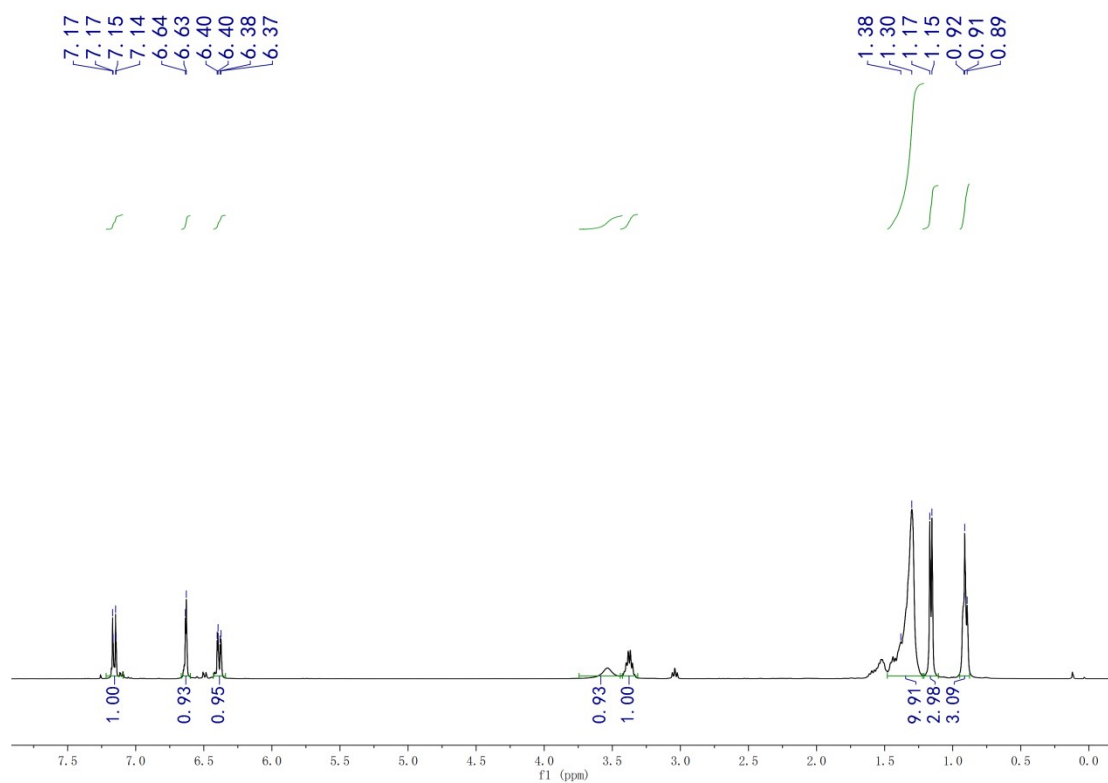

### 3.7 N-(2-Octyl)-4-fluoroaniline

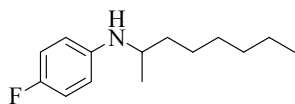

$^1\text{H NMR}$  (400 MHz,  $\text{CDCl}_3$ )  $\delta$  6.89 (t, 2H, Ar-H), 6.59 – 6.46 (m, 2H, Ar-H), 3.48 – 3.05 (m, 2H, NH, CH), 1.46 – 1.25 (m, 10H,  $\text{CH}_2$ ), 1.17 (d, 3H,  $\text{CH}_3$ ), 0.91 (t, 3H,  $\text{CH}_3$ ).

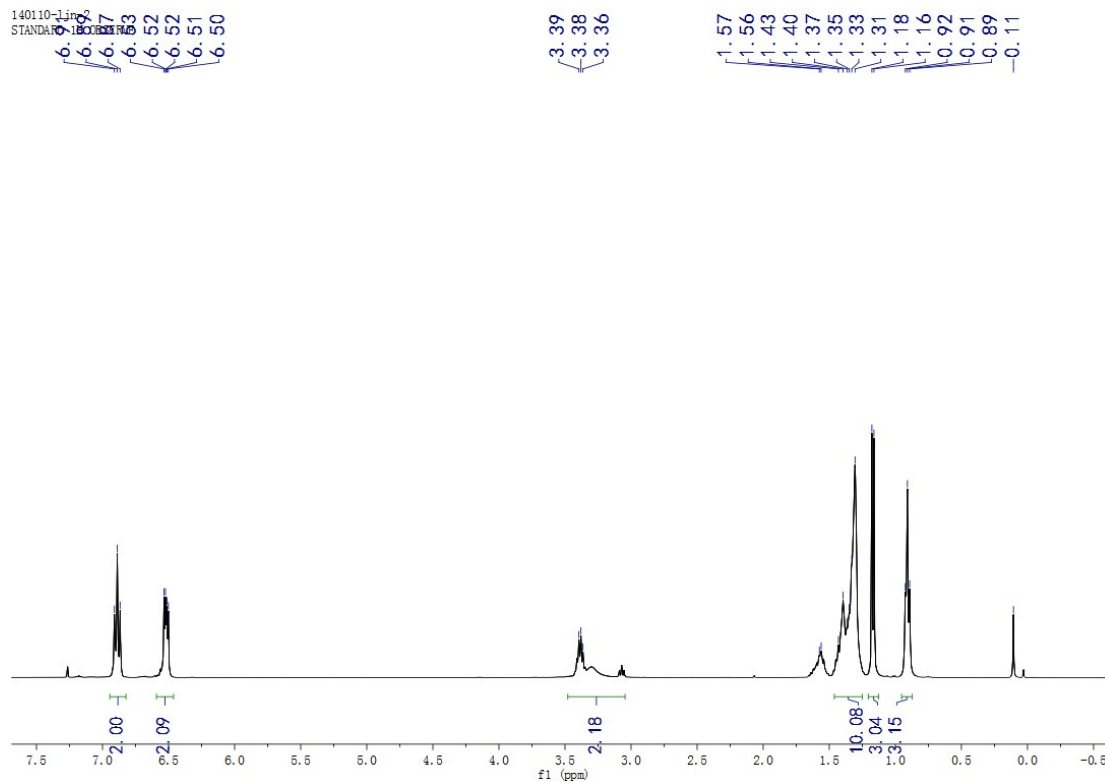

### 3.8 N-(2-Octyl)-2-fluoroaniline

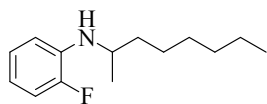

$^1\text{H NMR}$  (400 MHz,  $\text{CDCl}_3$ )  $\delta$  7.02 – 6.89 (m, 2H, Ar-H), 6.67 (t, 1H, Ar-H), 6.62 – 6.52 (m, 1H, Ar-H), 3.68 (s, 1H, NH), 3.45 (dd, 1H, CH), 1.29 (d, 10H,  $\text{CH}_2$ ), 1.19 (d, 3H,  $\text{CH}_3$ ), 0.88 (t, 3H,  $\text{CH}_3$ ).

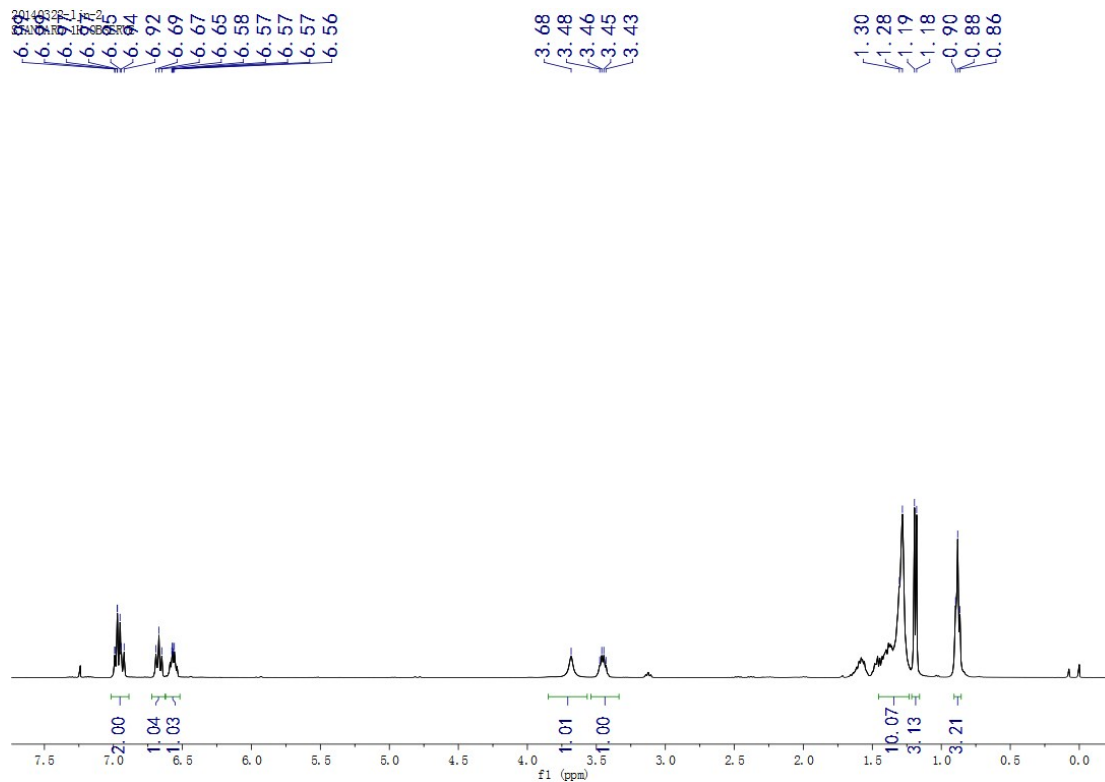

### 3.9 N-(2-Octyl)-4-methoxyaniline

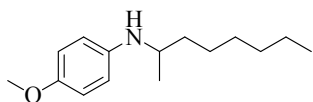

$^1\text{H NMR}$  (400 MHz,  $\text{CDCl}_3$ )  $\delta$  6.76 (d, 2H, Ar-H), 6.55 (d, 2H, Ar-H), 3.73 (s, 3H,  $\text{OCH}_3$ ), 3.35 (d, 1H, NH), 3.06 (dd, 1H, CH), 1.29 (d, 10H,  $\text{CH}_2$ ), 1.14 (d, 3H,  $\text{CH}_3$ ), 0.88 (s, 3H,  $\text{CH}_3$ ).

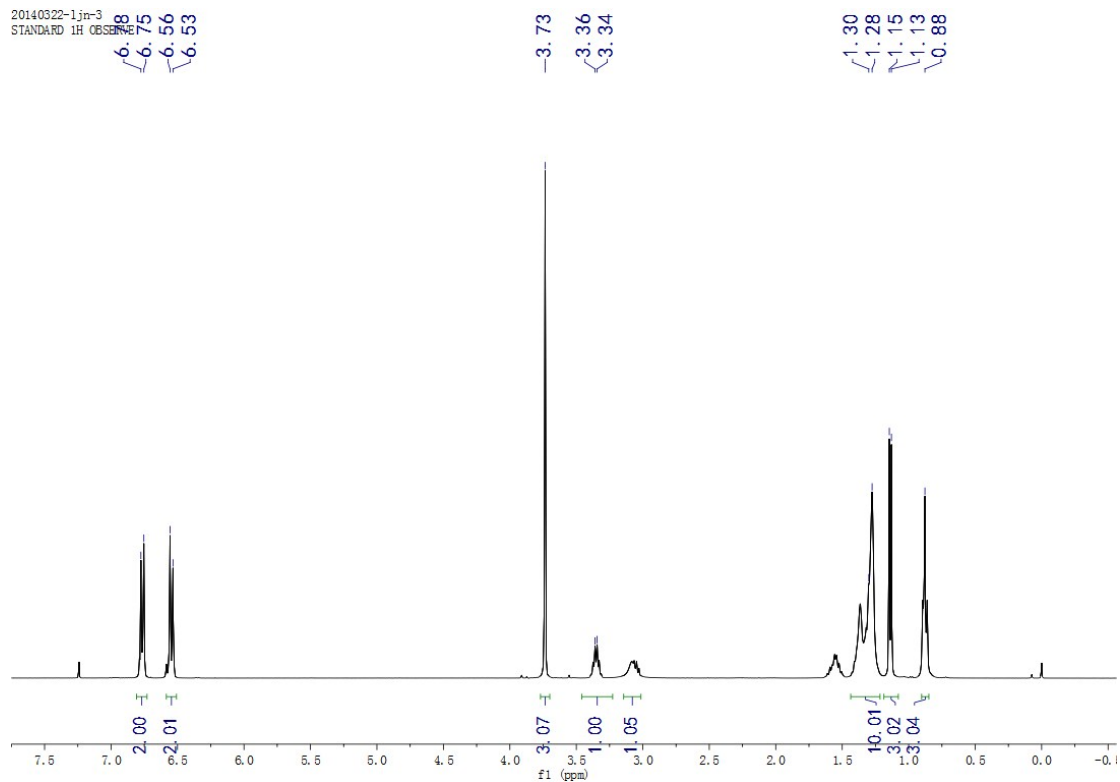



### 3.10 N-(2-Octyl)-2-methoxyaniline

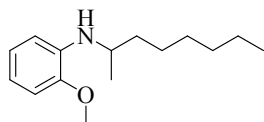

$^1\text{H NMR}$  (400 MHz,  $\text{CDCl}_3$ )  $\delta$  6.89 (d, 1H, Ar-H), 6.79 (d, 1H, Ar-H), 6.64 (dd, 2H, Ar-H), 3.87 (d, 3H,  $\text{OCH}_3$ ), 3.53 – 3.37 (m, 1H, CH), 1.33 (d, 10H,  $\text{CH}_2$ ), 1.22 (d, 3H,  $\text{CH}_3$ ), 0.92 (dd, 3H,  $\text{CH}_3$ ).

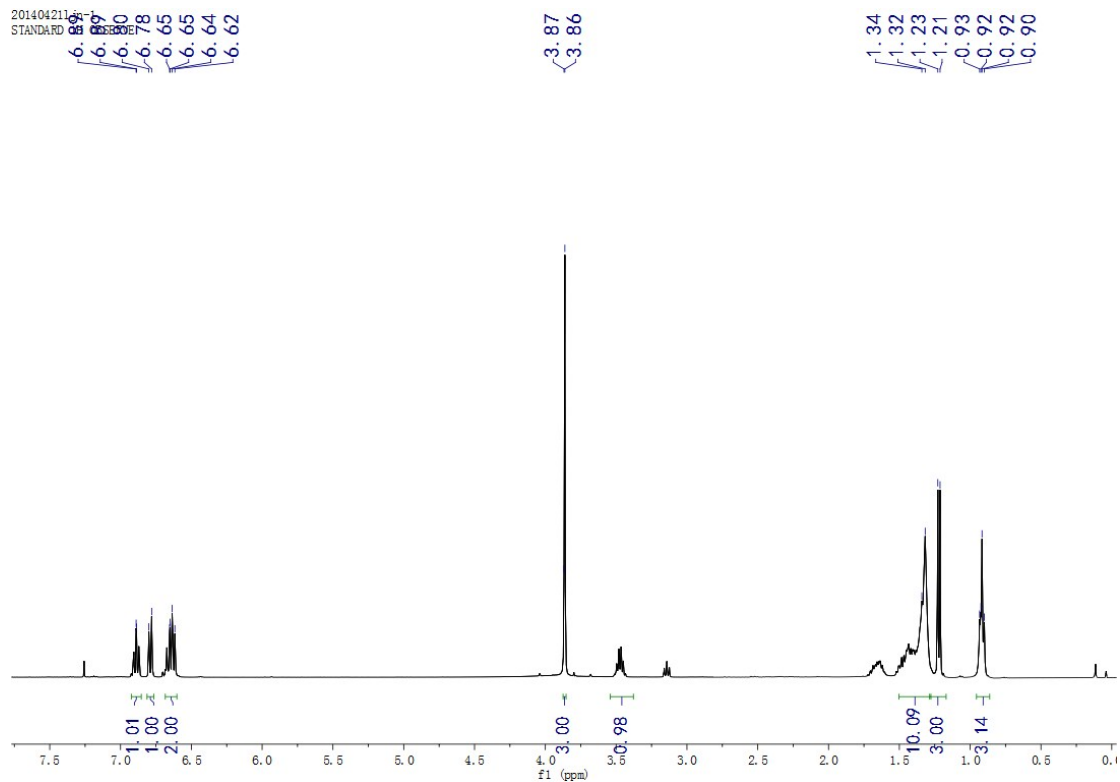

3.11 N-(2-Octyl)aniline

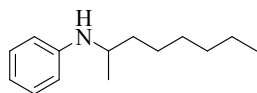

$^1\text{H NMR}$  (400 MHz,  $\text{CDCl}_3$ )  $\delta$  7.20 (t, 2H, Ar-H), 6.70 (t, 1H, Ar-H), 6.62 (d, 2H, Ar-H), 3.64 – 3.32 (m, 2H, NH, CH), 1.50 – 1.29 (m, 10H,  $\text{CH}_2$ ), 1.21 (d, 3H,  $\text{CH}_3$ ), 0.93 (d, 3H,  $\text{CH}_3$ ).

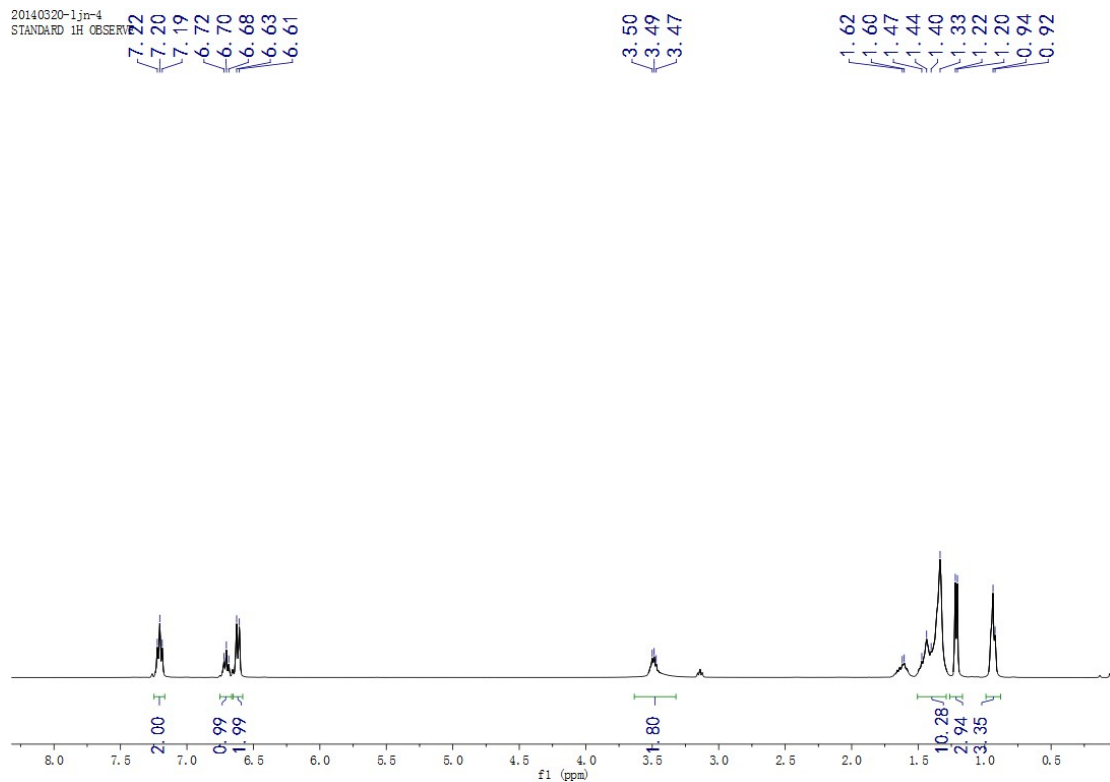

### 3.12 N-(2-Octyl)naphthalen-2-amine

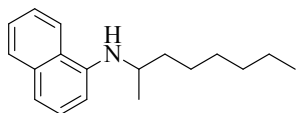

$^1\text{H NMR}$  (400 MHz,  $\text{CDCl}_3$ )  $\delta$  7.72 (d, 2H, Ar-H), 7.41 – 7.32 (m, 2H, Ar-H), 7.27 (d, 1H, Ar-H), 7.13 (d, 1H, Ar-H), 6.54 (d, 1H, Ar-H), 4.13 (s, 1H, NH), 3.58 (s, 1H, NH), 1.49 – 1.11 (m, 13H,  $\text{CH}_2$ ,  $\text{CH}_3$ ), 0.82 (d, 3H,  $\text{CH}_3$ ).

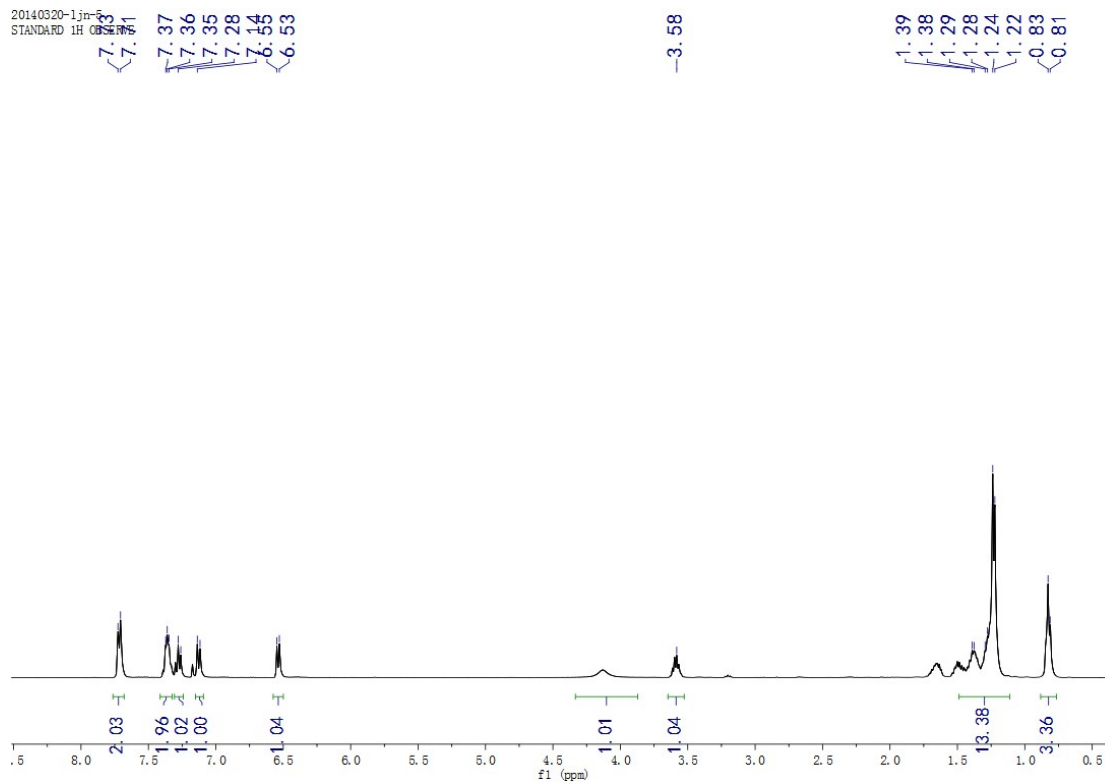

## 4. Ring-opening polymerization of $\epsilon$ -caprolactone by complex **3**

**Table S4** Polymerization  $\epsilon$ -caprolactone initiated by **3**

| Entry | Initiator | solvent | [M]/[I] | t/h | Yield/% <sup>a</sup> | T/°C | Mn(calc) <sup>b</sup> (10 <sup>4</sup> ) | Mn <sup>c</sup> (10 <sup>4</sup> ) | Mn(obsd) <sup>d</sup> (10 <sup>4</sup> ) | PDI  | Efficiency/% |
|-------|-----------|---------|---------|-----|----------------------|------|------------------------------------------|------------------------------------|------------------------------------------|------|--------------|
| 1     | <b>3</b>  | DME     | 200     | 24  | 82                   | 80   | 1.87                                     | 2.05                               | 1.15                                     | 1.53 | 90.1         |
| 2     | <b>3</b>  | DME     | 200     | 36  | 55                   | 60   | 1.25                                     | 2.17                               | 1.21                                     | 1.46 | 57.8         |
| 3     | <b>3</b>  | THF     | 200     | 24  | 90                   | 80   | 2.05                                     | 3.19                               | 1.79                                     | 1.59 | 64.3         |
| 4     | <b>3</b>  | THF     | 200     | 36  | 70                   | 60   | 1.60                                     | 2.00                               | 1.12                                     | 1.31 | 79.6         |
| 5     | <b>3</b>  | Tol     | 200     | 24  | 84                   | 80   | 1.91                                     | 2.25                               | 1.26                                     | 1.53 | 81.1         |
| 6     | <b>3</b>  | Tol     | 200     | 36  | 72                   | 60   | 1.64                                     | 3.09                               | 1.73                                     | 1.57 | 53.1         |

<sup>a</sup>Yield: weight of polymer obtained/weight of monomer used. <sup>b</sup>Mn(calc) =  $M_{\text{mono}} * [M]/[I] * \text{Conv.}$  <sup>c</sup>Measured by GPC relative to polystyrene standards. <sup>d</sup> Measured by GPC relative to standards with Mark-Houwink corrections for Mn (obsd) = 0.56 Mn (GPC) for  $\epsilon$ -caprolactone.
